# Supplementary material
Source: PubMed Central journal article supplement (PMC4766036)
Supplement: NIHMS736455-supplement-3.pdf [file NIHMS736455-supplement-3.pdf]

| <b>Posterior or Panuveitis Subtype</b> | <b>Number of eyes<br/>(percent of<br/>total)</b> | <b>Eyes with<br/>retinal NV<br/>(percent of<br/>total)</b> | <b>Prevalence (95%<br/>CI)</b> |
|----------------------------------------|--------------------------------------------------|------------------------------------------------------------|--------------------------------|
| Vogt-Koyanagi-Harada Syndrome          | 275 (2.0%)                                       | 1 (0.94%)                                                  | 0.40% (0.0% - 2.0%)            |
| Sympathetic Ophthalmia                 | 96 (0.70%)                                       | 0                                                          | 0.0% (0.0% - 3.8%)             |
| Primary or Secondary Panuveitis        | 1,314 (9.6%)                                     | 20 (1.9%)                                                  | 1.5% (0.9% - 2.3%)             |
| Retinochoroiditis                      | 183 (1.3%)                                       | 1 (0.94%)                                                  | 0.50% (0.0% - 3.0%)            |
| Multifocal Choroiditis with Panuveitis | 414 (3.0%)                                       | 2 (1.9%)                                                   | 0.50% (0.1% - 1.7%)            |
| Other Posterior Uveitis                | 409 (3.0%)                                       | 9 (8.5%)                                                   | 2.2% (1.0% - 4.0%)             |
| Birdshot Retinochorioretinopathy       | 345 (2.5%)                                       | 1 (0.94%)                                                  | 0.30% (0.0% - 1.6%)            |
| Retinal Vasculitis                     | 647 (4.7%)                                       | 39 (37%)                                                   | 5.7% (4.1% - 7.7%)             |

**Table 3**

Prevalence of retinal neovascularization by posterior or panuveitis subtype. The prevalence of retinal neovascularization was highest in patients with retinal vasculitis (5.7% of cases).
