# Supplementary material
Source: PubMed Central journal article supplement (PMC4766036)
Supplement: NIHMS736455-supplement-4.pdf [file NIHMS736455-supplement-4.pdf]

**Table 5 Incidence of retinal NV and associated risk factors<sup>†</sup>**

| Characteristic                   | Number at Risk | Incident NV Cases | Incidence Rate (% per eye-year) | Crude hazard ratio (HR) (95% CI) | Adjusted HR (95% CI)      |
|----------------------------------|----------------|-------------------|---------------------------------|----------------------------------|---------------------------|
| Number of eyes                   | 8487           | 88                | 0.33                            |                                  |                           |
| Age<35                           | 3342           | 48                | 0.44                            | 1.77 (1.1- 2.8)*                 | 2.4 (1.5 - 3.9)**         |
| Female (compared to male)        | 5399           | 52                | 0.31                            | 0.81 (0.51 - 1.3)                | 0.75 (0.47 - 1.2)         |
| Behçet disease                   | 226            | 5                 | 0.42                            | 1.5 (0.6 - 3.8)                  | 0.63 (0.26 – 1.5)         |
| Systemic lupus erythematosus     | 78             | 5                 | 1.2                             | 4.6 (1.6 - 14)**                 | 3.5 (1.1 – 11)*           |
| Sarcoidosis                      | 647            | 8                 | 0.30                            | 0.99 (0.41 - 2.4)                | 0.94 (0.39 - 2.3)         |
| HLA-B27+                         | 1100           | 6                 | 0.17                            | 0.47 (0.21 - 1.1)                | 1.3 (0.55 - 3.1)          |
| HLA-A29+                         | 179            | 2                 | 0.26                            | 0.84 (0.21 – 3.4)                | 0.44 (0.10 – 1.9)         |
| Polyarteritis nodosa             | 12             | 1                 | 1.5                             | 5.5 (0.73 – 41)                  | 7.2 (1.2 – 44)*           |
| Granulomatosis with polyangiitis | 4              | 0                 | 0                               | 0 (0 – 100) <sup>††</sup>        | 0 (0 – 99) <sup>††</sup>  |
| Other arteritis                  | 8              | 0                 | 0                               | 0 (0 – 64) <sup>††</sup>         | 0 (0 – 60) <sup>††</sup>  |
| Scleroderma                      | 6              | 0                 | 0                               | 0 (0 – 63) <sup>††</sup>         | 0 (0 – 360) <sup>††</sup> |
| Sjögren’s syndrome               | 16             | 0                 | 0                               | 0 (0 – 11) <sup>††</sup>         | 0 (0 – 8.4) <sup>††</sup> |
| Spondyloarthropathy (any)        | 482            | 3                 | 0.16                            | 0.53 (0.17 – 1.6)                | 1.2 (0.35 – 3.8)          |
| Polymyositis                     | 3              | 0                 | 0                               | 0 (0 – 45) <sup>††</sup>         | 0 (0 – 47) <sup>††</sup>  |
| Rheumatoid arthritis             | 166            | 0                 | 0                               | 0 (0 – 2.0) <sup>††</sup>        | 0 (0 – 2.1)               |
| Juvenile idiopathic arthritis    | 451            | 3                 | 0.17                            | 0.52 (0.16 – 1.6)                | 0.91 (0.26 – 3.2)         |
| Relapsing polychondritis         | 8              | 0                 | 0                               | 0 (0 – 49) <sup>††</sup>         | 0 (0 – 250) <sup>††</sup> |
| Cogan’s syndrome                 | 2              | 0                 | 0                               | 0 (0 – 110) <sup>††</sup>        | 0 (0 – 210) <sup>††</sup> |
| Crohn’s disease                  | 116            | 0                 | 0                               | 0 (0 – 2.4) <sup>††</sup>        | 0 (0 – 5.3) <sup>††</sup> |
| Ulcerative Colitis               | 106            | 1                 | 0.24                            | 0.82 (0.11 – 5.9)                | 1.2 (0.14 – 11)           |
| Multiple Sclerosis               | 147            | 1                 | 0.14                            | 0.50 (0.070 – 3.5)               | 0.44 (0.060 – 3.2)        |
| Familial systemic granulomatosis | 0              | 0                 | 0                               | --                               | --                        |

| Characteristic                                        | Number at Risk | Incident NV Cases | Incidence Rate (% per eye-year) | Crude hazard ratio (HR) (95% CI) | Adjusted HR (95% CI)   |
|-------------------------------------------------------|----------------|-------------------|---------------------------------|----------------------------------|------------------------|
| Hypertension                                          | 1791           | 30                | 0.40                            | 1.5 (0.93 - 2.5)                 | 1.5 (0.89 - 2.4)       |
| Diabetes                                              | 550            | 12                | 0.61                            | 2.1 (0.98 - 4.3)                 | 2.3 (1.1 - 4.9)*       |
| Bilateral                                             | 5590           | 80                | 0.39                            | 3.3 (1.6 - 6.8)**                | 2.0 (0.95 - 4.2)       |
| Current Smoker (vs. never smoker)                     | 1545           | 24                | 0.52                            | 2.3 (1.3 - 4.1)**                | 1.9 (1.1 - 3.4)*       |
| Former Smoker (vs. never smoker)                      | 889            | 12                | 0.39                            | 1.8 (0.84 - 3.8)                 | 1.7 (0.79 - 3.7)       |
| Uveitis diagnosis ≤ 1 years (vs >5 years)             | 4387           | 49                | 0.39                            | 2.6 (1.3 - 5.4)**                | 2.4 (1.1 - 5.0)*       |
| Uveitis diagnosis between 1 and 5 years (vs >5 years) | 2238           | 30                | 0.40                            | 2.8 (1.3 - 6.0)**                | 2.6 (1.2 - 6.0)*       |
| Site of uveitis                                       |                |                   |                                 |                                  |                        |
| Anterior                                              | 4857           | 15                | 0.11                            | 1.0 (reference group)            | 1.0 (reference group)  |
| Intermediate                                          | 1358           | 20                | 0.44                            | 4.0 (2.0 - 8.4)**                | 3.1 (1.5 - 6.6)**      |
| Posterior                                             | 1242           | 30                | 0.68                            | 6.7 (3.3 - 14)**                 | 5.2 (2.5 - 11)**       |
| Panuveitis                                            | 1030           | 23                | 0.60                            | 5.8 (2.8 - 12)**                 | 4.3 (2.0 - 9.3)**      |
| Activity                                              |                |                   |                                 |                                  |                        |
| Inactive                                              | --             | 40                | 0.22                            | 1.00 (reference group)           | 1.0 (reference group)  |
| Slightly active                                       | --             | 18                | 0.80                            | 2.8 (1.5 - 5.0)**                | 2.4 (1.3 - 4.4)**      |
| Active                                                | --             | 29                | 0.86                            | 2.7 (1.6 - 4.5)**                | 2.1 (1.2 - 3.7)**      |
| Anterior Chamber Cell                                 |                |                   |                                 |                                  |                        |
| No Cell                                               | --             | 53                | 0.30                            | 1.00 (reference group)           | 1.00 (reference group) |
| 0.5+                                                  | --             | 15                | 0.48                            | 1.4 (0.74 - 2.6)                 | 1.5 (0.81 - 2.8)       |
| 1+                                                    | --             | 7                 | 0.43                            | 1.2 (0.54 - 2.7)                 | 1.4 (0.60 - 3.1)       |
| 2+                                                    | --             | 8                 | 0.99                            | 2.4 (1.1 - 5.6)*                 | 2.7 (1.2 - 6.0)*       |
| 3+                                                    | --             | 4                 | 1.3                             | 3.2 (1.2 - 8.8)*                 | 3.9 (1.3 - 11)*        |

| Characteristic                            | Number at Risk | Incident NV Cases | Incidence Rate (% per eye-year) | Crude hazard ratio (HR) (95% CI) | Adjusted HR (95% CI)   |
|-------------------------------------------|----------------|-------------------|---------------------------------|----------------------------------|------------------------|
| Vitreous Cell                             |                |                   |                                 |                                  |                        |
| No Cell                                   | --             | 49                | 0.28                            | 1.00 (reference group)           | 1.00 (reference group) |
| 0.5+                                      | --             | 10                | 0.43                            | 1.3 (0.63 - 2.8)                 | 0.95 (0.45 - 2.0)      |
| 1+                                        | --             | 16                | 0.78                            | 2.3 (1.3 - 4.2)**                | 1.7 (0.94 - 3.1)       |
| 2+                                        | --             | 7                 | 0.66                            | 1.7 (0.70 - 4.1)                 | 1.2 (0.48 - 3.0)       |
| 3+                                        | --             | 1                 | 0.39                            | 0.96 (0.14 - 6.8)                | 0.65 (0.090 - 4.6)     |
| Vitreous Haze                             |                |                   |                                 |                                  |                        |
| None                                      | --             | 59                | 0.29                            | 1.00 (reference group)           | 1.00 (reference group) |
| 1+                                        | --             | 18                | 1.0                             | 3.2 (1.3 - 5.9)*                 | 2.3(1.1 - 5.0)*        |
| 2+                                        | --             | 2                 | 0.45                            | 1.2 (0.11 - 4.7)*                | 0.97(0.10 - 4.1)*      |
| 3+                                        | --             | 0                 | 0                               | 0.00(0.00 - 7.25)*               | 0.00(0.00 - 6.08)*     |
| Macular edema                             | --             | 14                | 0.72                            | 2.0 (1.1 - 3.8)*                 | 1.5 (0.75 - 3.1)       |
| Epiretinal membrane                       | --             | 6                 | 0.32                            | 1.2 (0.51 - 2.7)                 | 0.83 (0.37 - 1.9)      |
| Exudative retinal detachment              | --             | 3                 | 2.5                             | 6.3 (2.1 - 19)**                 | 4.1 (1.3 - 13)*        |
| Choroidal neovascularization              | --             | 2                 | 3.0                             | 6.7 (0.90 - 49)                  | 4.1 (0.46 - 36)        |
| Snowballs present                         | --             | 7                 | 1.2                             | 2.9 (1.4 - 6.3)**                | 2.3 (1.0 - 5.4)        |
| Retinal vascular sheathing                | --             | 14                | 1.8                             | 5.2 (2.7 - 10)**                 | 2.6 (1.4 - 4.9)**      |
| Retinal vascular occlusion                | --             | 4                 | 9.0                             | 20 (7.3 - 57)**                  | 10 (3.0 - 33)**        |
| Active inflammatory chorioretinal lesions | --             | 1                 | 0.17                            | 0.35 (0.05 - 2.6)                | 0.16 (0.020 - 1.2)     |

† Adjusted analysis adjusts for age category, gender, bilateral inflammation, smoking status, hypertension, diabetes, primary ocular location of inflammation, systemic lupus erythematosus, and time from diagnosis. For associated characteristics which could vary from visit to visit (such as activity), the analysis was done using a time varying approach. For these characteristics, no value for number of eyes is given for variables analyzed as time-dependent covariates.

<sup>††</sup>For characteristics which were not present in any patients with retinal NV, a hazard ratio (HR) of zero is given but an estimated confidence interval is calculated using a profile likelihood method (see text for details).

These conditions with low numbers of retinal neovascularization are available in supplemental tables online and omitted from the print versions for brevity. Data reporting risk based on gradings of anterior chamber cell, vitreous cell, and vitreous haze are available in the supplemental table.

Takayasu arteritis and dermatomyositis had fewer than 5 observations in both the prevalence and incidence analyses and are omitted from the tables. Although there were 8 eyes with familial systemic granulomatosis in the prevalence analysis, none were eligible for the incidence analysis.

\*= $p < 0.05$

\*\*= $p < 0.01$
