# Supplementary material
Source: PubMed Central journal article supplement (PMC4766036)
Supplement: NIHMS736455-supplement-5.pdf [file NIHMS736455-supplement-5.pdf]

| Posterior or Panuveitis subtype        | Total Eyes | Number with retinal NV | Person Years | Incidence rate % per eye-year (95%CI) |
|----------------------------------------|------------|------------------------|--------------|---------------------------------------|
| Vogt-Koyanagi-Harada Syndrome          | 179        | 6                      | 602.18       | 1.0 (0.37 – 2.2)                      |
| Sympathetic Ophthalmia                 | 58         | 0                      | 296.08       | 0.0 (0.0 – 1.0)                       |
| Primary or Secondary Panuveitis        | 867        | 18                     | 3225.61      | 0.56 (0.33 - 0.88)                    |
| Retinochoroiditis                      | 91         | 0                      | 244.06       | 0.0 (0.0 – 1.2)                       |
| Multifocal Choroiditis with Panuveitis | 254        | 3                      | 1116.56      | 0.27 (0.06 - 0.79)                    |
| Other Posterior Uveitis                | 194        | 2                      | 625.67       | 0.32 (0.04 – 1.2)                     |
| Birdshot Retinochorioretinopathy       | 233        | 1                      | 1011.39      | 0.10 (0.0 - 0.55)                     |
| Retinal Vasculitis                     | 396        | 23                     | 1151.44      | 2.0 (1.3 – 3.0)                       |

**Table 6**

Incidence of retinal retinal neovascularization by posterior or panuveitis subtype. The incidence of retinal neovascularization was highest with retinal vasculitis (2.0% per eye-year) followed by Vogt-Koyanagi-Harada syndrome (1.0% per eye-year).
